# Supplementary material
Source: PubMed Central journal article supplement (PMC3935584)
Supplement: ASN.2013040355_ASN2013040355SupplementaryData.pdf [file ASN.2013040355_ASN2013040355SupplementaryData.pdf]

**Supplemental Table 1. In silico nuclear receptor site prediction for vitamin D response elements in the *HAMP* gene promoter (-1071 bp)** For general nuclear receptor target prediction the NubiScan program ([www.nubiscan.unibas.ch](http://www.nubiscan.unibas.ch)) was used. A -1071bp *HAMP* gene promoter sequence was analyzed using the general weighted matrix for nuclear receptor halvesites (including the VDR canonical halvesites), whereby direct-repeat 3 sites were acquisitioned. For the search parameter, an automatic scan with a raw score threshold of 0.5 was used, where the optimal match would have a raw score of 1.

| SEQUENCE LENGTH | POSITION | STRAND | RAW SCORE | P VALUE  | SITE SEQUENCE    |
|-----------------|----------|--------|-----------|----------|------------------|
| 1071            | 72       | -      | 0.602588  | 0.132854 | AGTCCGatgAGTACA  |
| 1071            | 952      | +      | 0.596919  | 0.259562 | AGGGGAgggGGCTCA  |
| 1071            | 422      | -      | 0.564744  | 0.580772 | TGGCCAtaaATGACA  |
| 1071            | 903      | -      | 0.564162  | 0.457681 | AGATAAagcgGGAACA |
| 1071            | 649      | +      | 0.526702  | 0.868162 | TGTGCAtgtAGGCGA  |
| 1071            | 193      | -      | 0.525093  | 0.687983 | AGCCCAggaGGCTGA  |
| 1071            | 10       | +      | 0.507491  | 0.791509 | GGCTGAgttGGTGCA  |

A.

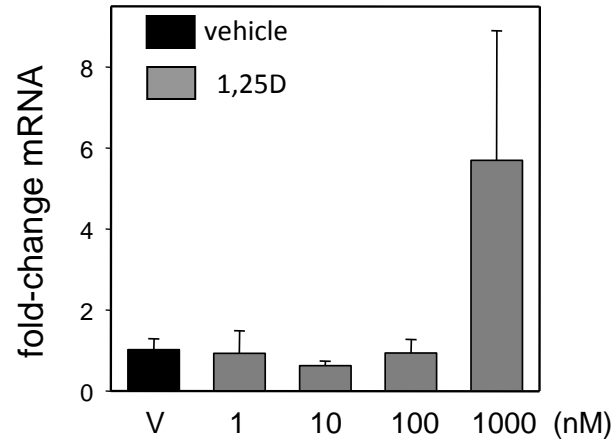

B.

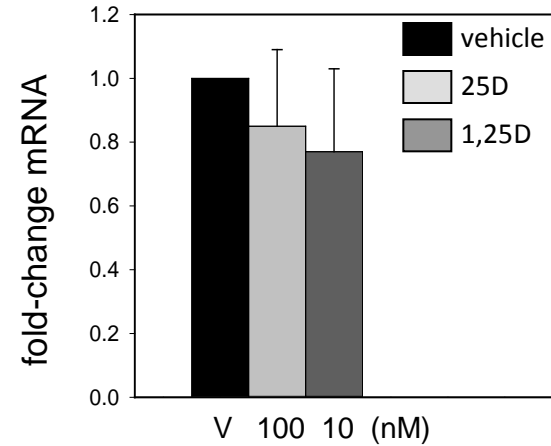

C.

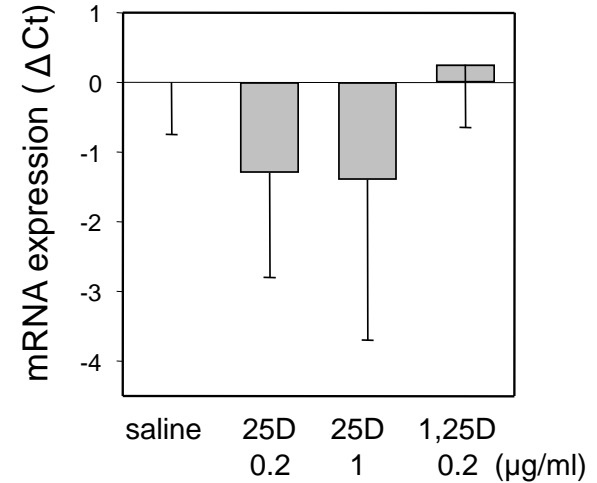

**Supplemental Figure 1. Effect of vitamin D on expression of hepcidin in mice.** S1A. Peripheral blood-derived monocytes from wild type C57BL/6 mice showed no change in mouse hepcidin (*Hamp*) gene expression following 24 hr treatment with increasing doses of 1,25D (1-100 nM). S1B. Similar results were also observed for the mouse monocyte cell line J774 following 6 hr treatment with 25D (100 nM) or 1,25D (10 nM). S1C. To assess possible effects of vitamin D on hepatic expression of *Hamp* in vivo, 12 wk old C57BL/6 male mice were placed on a vitamin D-deficient diet for 6 weeks then transferred to a 4 parts per million (ppm) iron diet for one week. Groups of mice (n=4 in each case) were then treated with either 0.2  $\mu$ g/g body weight of 25D by intraperitoneal (IP) injection, 1  $\mu$ g/g 25D IP, 0.2  $\mu$ g/g of 1,25D IP. A similar volume of saline IP (saline) was used as a control. Analysis of liver mRNA in these mice 24 hours after treatment showed no effect on expression of *Hamp*.
